# Supplementary material
Source: publisher figshare collection journal article supplement (https://gsajournals.figshare.com/ndownloader/files/23204516)
Supplement: Supplementary file 1 [file 23204516]

## Sheet: Table S7
Table S7. Phenotypic variables description and associated results from GWAS and genomic prediction analysis.
See below for a description of the columns
NA: unavailable data
Trait (as described in Supplementary File S1)	Description	Unit	Type	H²: Analogous to broad sense heritability	Location-Dates	Variance PopxEnv/Variance Pop	Number of natural populations phenotyped	Mean value of natural populations	Standard deviation of natural populations	Maximum value of natural populations	Minimum value of natural populations	Number of cultivars phenotyped	Mean value of cultivars	Standard deviation of cultivars	Maximum value of cultivars	Minimum value of cultivars	Moran's index	Number of GWAS detected markers (qvalue<10%)	Variance explained by GWAS markers (%)	Genomic prediction: predictive ability with all markers	Genomic prediction: standard deviation of predictive ability across samples	Predictive ability for the cultivars	Minimum number of SNP required to meet 95% of max predictive ability	Predictive ability gain from using GWAS markers rather than random markers using the minimum number of markers required to meet 95% of the maximum predictive ability	Maximum predictive ability minus predictive ability with all markers	Performance of calibration set optimized using both genetic and geographical distances	Performance of calibration set optimized using genetic distances	Performance of calibration set optimized using geographical distances
ADF_04_me17	NIRS ADF	% DM	Biochemistry	0.73	ME-19/04/2017		350	16.19	1.06	19.43	12.8	26	16.7	0.95	18.33	14.78	0.07	0	0	0.5	0.08	0.38	42	0.37	0.14	0.75	0.77	0.45
ADF_10_me17	NIRS ADF	% DM	Biochemistry	0.71	ME-04/10/2017		350	22.07	0.95	24.75	18.86	26	22.23	1.13	24.15	19.27	0.09	0	0	0.55	0.08	0.28	77	-0.07	0.06	0.67	0.69	0.59
ADF_avg	NIRS ADF	% DM	Biochemistry	0.76	ME-19/04/2017;ME-04/10/2017	0.79	350	19.1	0.9	22.06	16.24	26	19.46	0.74	20.75	17.6	0.06	0	0	0.54	0.1	0.27	998	0.15	0	0.76	0.65	0.57
ADL_04_me17	NIRS ADL	% DM	Biochemistry	0.59	ME-19/04/2017		350	0.47	0.14	0.88	0.1	26	0.48	0.12	0.77	0.25	0.09	0	0	0.52	0.1	0.17	869	0.11	0.02	0.46	0.52	0.6
ADL_10_me17	NIRS ADL	% DM	Biochemistry	0.86	ME-04/10/2017		350	1.32	0.26	2.66	0.69	26	1.33	0.33	2.31	0.84	0.2	0	0	0.77	0.05	0.38	44	0.38	0.02	0.79	0.79	0.78
ADL_avg	NIRS ADL	% DM	Biochemistry	0.81	ME-19/04/2017;ME-04/10/2017	0.83	350	0.9	0.18	1.72	0.45	26	16.7	0.95	18.33	14.78	0.2	0	0	0.75	0.03	0.38	32	0.23	0.01	0.67	0.66	0.76
AGR_me17	Autumn Growth Rate	millimetres by degree day	Canopy height	0.51	ME-13/09/2017>04/10/2017		350	0.12	0.03	0.21	0.01	26	0.14	0.03	0.22	0.09	0.05	0	0	0.35	0.07	-0.37	13	-0.23	0.18	0.55	0.48	0.56
AGR_po17	Autumn Growth Rate	millimetres by degree day	Canopy height	0.9	PO-07/09/2017>11/10/2017		385	0.12	0.05	0.19	-0.03	14	0.13	0.05	0.19	0.04	0.29	0	0	0.87	0.04	0.34	21	0.28	0.01	0.83	0.81	0.74
AHD_avg	Aftermath Heading	score 1-9	Phenology	0.9	ME-01/08/2016;ME-29/08/2016;ME-22/08/2017;LU-25/07/2016;LU-21/08/2017;PO-22/06/2016;PO-15/08/2016;PO-29/08/2017		385	2.41	0.63	5.74	1.13	29	1.86	0.39	2.89	1	0.09	4	0.43	0.76	0.06	0.65	11	0.35	0.01	0.79	0.76	0.74
AHD_me16	Aftermath Heading	score 1-9	Phenology	0.8	ME-01/08/2016;ME-29/08/2016		350	1.32	0.41	5.37	0.84	26	1.24	0.21	1.84	1.01	0.02	52	0.78	0.61	0.08	0.27	48	0.38	0.12	0.55	0.57	0.7
AHD_me17	Aftermath Heading	score 1-9	Phenology	0.86	ME-22/08/2017		350	2.5	1.01	7.97	0.7	26	2.13	0.67	3.53	1.03	0.06	2	0.26	0.64	0.08	0.5	766	0.03	0.04	0.6	0.63	0.61
AHD_lu16	Aftermath Heading	score 1-9	Phenology	0.94	LU-25/07/2016		380	2.77	1.13	6.36	0.88	14	2.37	0.96	4.55	1.21	0.19	0	0	0.83	0.04	0.68	28	0.22	0.01	0.67	0.72	0.73
AHD_lu17	Aftermath Heading	score 1-9	Phenology	0.83	LU-21/08/2017		380	1.23	0.39	5.1	0.91	14	1.07	0.14	1.38	0.95	0.05	17	0.63	0.65	0.11	0.3	84	0.05	0.02	0.59	0.6	0.57
AHD_po16	Aftermath Heading	score 1-9	Phenology	0.71	PO-22/06/2016;PO-15/08/2016		354	3.41	0.93	6.93	1.21	14	2.09	0.89	3.68	0.55	0.07	1	0.16	0.71	0.07	0.62	3	0.57	0.02	0.7	0.71	0.74
AHD_po17	Aftermath Heading	score 1-9	Phenology	0.84	PO-29/08/2017		385	2.37	1.07	6.74	0.77	14	1.72	0.67	3.61	0.44	0.13	0	0	0.73	0.07	0.55	89	0.01	0	0.74	0.79	0.7
AMH_me17	Autumn Maximum Height	millimetres	Canopy height	0.55	ME-2017		350	118.71	10.06	147.34	86.47	26	130.53	7.01	150.34	119.75	0.02	0	0	0.48	0.08	0.41	1119	0.11	0	0.89	0.83	0.55
AMH_po17	Autumn Maximum Height	millimetres	Canopy height	0.9	PO-2017		385	122.19	22.42	161.69	57.5	14	124.71	24.83	148.19	69.83	0.28	7	0.38	0.85	0.03	0.53	61	0.2	0	0.77	0.73	0.61
13C_lu16	Lamina δ13C	discrimination value	Lamina chemistry	0.61	LU-19/04/2016		380	-30.41	0.29	-29.61	-31.26	6	-30.72	0.3	-30.22	-31.23	0.07	0	0	0.35	0.11	-0.21	78	-0.22	0.07	0.39	0.34	0.61
CH300h_lu16	Canopy Height 300 degree days before heading	millimetres	Canopy height	NA	LU-2016		380	125.33	29.5	217.58	43.69	14	134.59	29.86	160.26	60.72	0.05	0	0	0.68	0.07	0.77	13	0.24	0.05	0.63	0.65	0.52
CH300h_lu17	Canopy Height 300 degree days before heading	millimetres	Canopy height	NA	LU-2017		353	126.45	21.39	182.48	58.22	12	136.02	22.09	165.67	81.49	0.07	12	0.38	0.73	0.06	0.7	106	0.29	0	0.67	0.65	0.36
CH300h_po16	Canopy Height 300 degree days before heading	millimetres	Canopy height	NA	PO-2016		384	196.24	51.58	301.56	57.91	14	219.73	47.51	277.66	119.76	0.16	34	0.72	0.86	0.03	0.82	17	0.37	0.05	0.63	0.61	0.76
CH300h_po17	Canopy Height 300 degree days before heading	millimetres	Canopy height	NA	PO-2017		385	120.99	26.45	197.23	50.65	14	137.87	20.36	177.29	100.55	0.1	5	0.29	0.73	0.04	0.85	48	0.28	0.05	0.7	0.67	0.6
CHs300_me16	Canopy Height 300 degree days after start of growth	millimetres	Canopy height	NA	ME-2016		350	35.12	8.81	66.72	18	26	40.97	11.91	72.28	19.09	0.05	0	0	0.59	0.07	0.4	778	-0.05	0.02	0.7	0.71	0.67
CHs300_me17	Canopy Height 300 degree days after start of growth	millimetres	Canopy height	NA	ME-2017		350	64.9	7.05	87.65	39.93	26	69.88	6.56	85.08	55.14	0.04	0	0	0.52	0.1	0.26	1145	-0.37	0.05	0.69	0.64	0.68
CHs300_lu16	Canopy Height 300 degree days after start of growth	millimetres	Canopy height	NA	LU-2016		380	54.43	7.27	89.86	36.7	14	60.56	8.27	74.48	48.62	0.05	0	0	0.63	0.09	0.77	39	0.24	0.13	0.56	0.58	0.67
CHs300_lu17	Canopy Height 300 degree days after start of growth	millimetres	Canopy height	NA	LU-2017		380	57.9	5.94	77.96	35.74	14	62.45	6.05	74.93	54.36	0.06	4	0.16	0.51	0.11	0.58	2	0.28	0.19	0.58	0.52	0.64
CHs300_po16	Canopy Height 300 degree days after start of growth	millimetres	Canopy height	NA	PO-2016		385	204.71	33.96	326.73	91.61	14	221.25	22.82	260.54	182.15	0.08	11	0.49	0.8	0.05	0.75	7	0.66	0.02	0.56	0.66	0.73
CHs300_po17	Canopy Height 300 degree days after start of growth	millimetres	Canopy height	NA	PO-2017		385	79.36	11.87	120.06	45.53	14	90.98	14.66	127.26	74.38	0.17	2	0.04	0.66	0.07	0.73	143	-0.05	0.01	0.71	0.74	0.7
CH400h_lu16	Canopy Height 400 degree days before heading	millimetres	Canopy height	NA	LU-2016		380	92.96	24.66	167.16	34.56	14	100.78	26.29	128.91	37.4	0.05	0	0	0.72	0.07	0.78	11	0.51	0.02	0.56	0.6	0.59
CH400h_lu17	Canopy Height 400 degree days before heading	millimetres	Canopy height	NA	LU-2017		377	109.17	23.25	161.8	39.04	12	114.64	22.32	140.54	61.82	0.07	28	0.63	0.79	0.05	0.75	29	0.61	0.03	0.54	0.57	0.58
CH400h_po16	Canopy Height 400 degree days before heading	millimetres	Canopy height	NA	PO-2016		385	137.48	52.03	264.26	27.66	14	162.26	50.23	223.43	63.35	0.15	59	0.76	0.85	0.04	0.9	5	0.82	0.06	0.59	0.56	0.75
CH400h_po17	Canopy Height 400 degree days before heading	millimetres	Canopy height	NA	PO-2017		385	93.21	23.48	163.72	37.76	14	105.56	24.36	148.13	46.59	0.11	34	0.48	0.78	0.05	0.87	19	0.34	0.02	0.6	0.67	0.66
CHs500_me16	Canopy Height 500 degree days after start of growth	millimetres	Canopy height	NA	ME-2016		350	110.84	28.06	228.88	55.38	26	126.67	27.28	187.26	78.5	0.06	2	0.34	0.76	0.05	0.65	44	0.25	0	0.69	0.64	0.73
CHs500_me17	Canopy Height 500 degree days after start of growth	millimetres	Canopy height	NA	ME-2017		350	114.04	16.49	181.03	68.39	26	131.25	14.72	162.13	103.77	0.08	21	0.57	0.73	0.06	0.76	8	0.48	0.06	0.63	0.67	0.65
CHs500_lu16	Canopy Height 500 degree days after start of growth	millimetres	Canopy height	NA	LU-2016		380	103.6	22	222.3	64.41	14	113.89	21.32	153.14	78.41	0.07	40	0.58	0.74	0.05	0.92	58	0.26	0.01	0.67	0.76	0.68
CHs500_lu17	Canopy Height 500 degree days after start of growth	millimetres	Canopy height	NA	LU-2017		380	89.63	12.07	148.7	55.24	14	98.33	9.84	118.99	79.85	0.09	0	0	0.63	0.07	0.8	103	0.24	0.06	0.72	0.73	0.75
CHs500_po17	Canopy Height 500 degree days after start of growth	millimetres	Canopy height	NA	PO-2017		384	136.31	27.98	343.88	62.74	14	150.57	25.73	201.05	115.01	0.1	5	0.21	0.71	0.08	0.82	51	0.21	0.04	0.7	0.77	0.71
DES_po15	Days From Sowing To Emergence	number of days	Emergence	0.7	PO-28/05/2015		385	28.43	2.7	36.61	21.46	14	27.21	3.43	31.1	22.19	0.11	0	0	0.47	0.09	0.48	17	0.2	0.03	0.77	0.78	0.75
DHE_07_lu16	Disease-Helmintosporium Susceptibility	score 1-9	Diseases	0.69	LU-12/07/2016		380	4.57	0.52	6.15	3.48	14	4.51	0.58	5.59	3.73	0.12	0	0	0.64	0.07	0.75	52	-0.04	0.02	0.54	0.63	0.79
DHE_01_lu17	Disease-Helmintosporium Susceptibility	score 1-9	Diseases	0.55	LU-31/01/2017		380	5.52	0.56	7.12	4.12	14	5.3	0.57	6.2	4.2	0.12	0	0	0.62	0.05	0.36	192	0.11	0	0.7	0.71	0.57
DHE_04_lu17	Disease-Helmintosporium Susceptibility	score 1-9	Diseases	0.77	LU-06/04/2017;LU-02/05/2017		380	3.69	0.65	5.96	2.29	17	3.82	0.48	4.67	2.56	0.06	0	0	0.55	0.09	0.36	110	-0.01	0.07	0.53	0.59	0.72
DIS_avg	Disease-Global	score 1-9	Diseases	0.93	ME-29/08/2016;ME-24/08/2017;ME-02/10/2017;LU-28/07/2015;LU-31/08/2015;LU-09/10/2015;LU-14/10/2015;LU-25/07/2016;LU-26/10/2017;LU-15/11/2017;PO-29/08/2017;PO-31/08/2015;PO-03/09/2015;PO-12/10/2017	1.13	385	3.2	0.49	4.78	2.14	29	3.06	0.48	5.13	2.57	0.07	0	0	0.74	0.06	0.65	73	0.4	0.01	0.7	0.68	0.79
DIS_me16	Disease-Global	score 1-9	Diseases	0.86	ME-29/08/2016		350	2.18	0.76	6.07	0.84	26	1.62	0.59	3.82	0.84	0.13	0	0	0.7	0.09	0.39	1374	-0.1	0.01	0.62	0.52	0.79
DIS_me17	Disease-Global	score 1-9	Diseases	0.64	ME-24/08/2017;ME-02/10/2017		350	2.37	0.41	4.14	1.14	26	2.03	0.63	4.67	1.43	0.03	2	0.09	0.55	0.1	0.75	109	0.4	0.09	0.43	0.43	0.79
DIS_lu15	Disease-Global	score 1-9	Diseases	0.85	LU-28/07/2015;LU-31/08/2015;LU-09/10/2015;LU-14/10/2015		380	3.86	0.58	5.76	2.29	14	3.28	0.66	4.69	2.08	0.07	0	0	0.7	0.06	0.6	47	0.52	0	0.75	0.63	0.75
DIS_lu16	Disease-Global	score 1-9	Diseases	0.75	LU-25/07/2016		380	1.28	0.56	4.34	0.97	14	1.19	0.37	2.3	0.99	0.08	4	0.27	0.67	0.09	0.63	46	0.43	0	0.59	0.55	0.75
DIS_lu17	Disease-Global	score 1-9	Diseases	0.64	LU-26/10/2017;LU-15/11/2017		380	4.91	0.5	6.79	3.75	14	4.71	0.62	6.57	3.95	0.05	0	0	0.48	0.11	0.51	214	0.24	0.03	0.55	0.64	0.67
DIS_po15	Disease-Global	score 1-9	Diseases	0.83	PO-31/08/2015;PO-03/09/2015		385	2.02	0.81	5.31	0.47	14	1.66	0.7	3.23	0.78	0.1	0	0	0.63	0.08	0.74	3	0.62	0.12	0.64	0.59	0.77
DIS_po17	Disease-Global	score 1-9	Diseases	0.7	PO-29/08/2017;PO-12/10/2017		385	3.6	0.82	6.12	1.79	14	3.04	1.1	6.55	2.12	0.07	0	0	0.63	0.08	0.72	290	0.09	0.04	0.7	0.73	0.69
DNDF_04_me17	NIRS cell wall digestibilty	% DM	Biochemistry	0.62	ME-19/04/2017		350	81.08	1.31	84.2	74.06	26	80.67	1.41	82.71	75.77	0.06	0	0	0.51	0.08	0.52	165	0.07	0.08	0.62	0.71	0.76
DNDF_10_me17	NIRS cell wall digestibilty	% DM	Biochemistry	0.66	ME-04/10/2017		350	72.7	2.6	79.02	64.43	26	72.33	2.01	75.82	68.23	0.14	0	0	0.55	0.09	0.03	121	0.2	0.05	0.53	0.56	0.72
DNDF_avg	NIRS cell wall digestibilty	% DM	Biochemistry	0.63	ME-19/04/2017;ME-04/10/2017	2.55	350	76.89	1.59	80.93	71.63	26	76.5	1.37	78.56	72	0.13	0	0	0.59	0.07	0.31	7	0.62	0.07	0.54	0.53	0.69
DRB_lu1516	Disease-Black Rust Susceptibility	score 1-9	Diseases	0.77	LU-28/07/2015;LU-31/08/2015;LU-09/10/2015;LU-14/10/2015;LU-25/07/2016	0.96	380	3.34	0.54	5.16	2.03	17	2.53	0.55	3.98	1.68	0.08	0	0	0.73	0.07	0.57	32	0.58	0.06	0.56	0.57	0.81
DRO_avg	Drought Stress symptoms	score 1-9	Abiotic stresses	0.78	LU-25/07/2016;LU-02/09/2016;PO-26/08/2016;PO-21/09/2016	0.45	385	6.56	0.56	8.38	5.01	17	6.14	0.72	7.48	4.77	0.11	2	0.01	0.75	0.04	0.67	32	0.56	0.04	0.57	0.6	0.81
DRO_lu16	Drought Stress symptoms	score 1-9	Abiotic stresses	0.79	LU-25/07/2016;LU-02/09/2016		380	6.72	0.65	8.92	5.06	17	6.27	0.72	7.67	5.17	0.09	0	0	0.74	0.06	0.76	1176	0.16	0.01	0.55	0.52	0.68
DRO_po16	Drought Stress symptoms	score 1-9	Abiotic stresses	0.76	PO-26/08/2016;PO-21/09/2016		385	6.4	0.6	8.19	4.56	14	5.74	0.85	7.09	4.27	0.07	0	0	0.6	0.11	0.56	26	0.19	0.02	0.49	0.49	0.81
DST_avg	Spike Density	score 1-9	Sexual reproduction	0.47	LU-07/06/2017;PO-20/04/2017	1.99	348	6.43	1.1	8.49	3.97	16	6.67	1.69	8.59	2.1	0.16	17	0.57	0.82	0.04	0.88	42	0.39	0.01	0.69	0.68	0.79
DST_lu17	Spike Density	score 1-9	Sexual reproduction	0.96	LU-07/06/2017		381	6.17	1.43	8.79	2.12	16	6.28	1.84	8.3	1.59	0.16	22	0.65	0.86	0.04	0.81	9	0.25	0.01	0.68	0.71	0.78
resDST_lu17	Spike Density corrected for earliness	score 1-9	Sexual reproduction	0.93	LU-07/06/2018		380	0	1.07	2.1	-2.79	16	0.92	0.82	2.13	-0.84	0.18	0	0	0.79	0.04	0.61	62	0.04	0.02	0.77	0.82	0.59
DST_po17	Spike Density	score 1-9	Sexual reproduction	0.57	PO-20/04/2017		351	7.6	0.71	9.43	5.8	11	7.27	0.74	8.13	5.27	0.04	0	0	0.44	0.11	0.03	5	0.41	0.11	0.56	0.59	0.68
DVG_04_lu17	Sward Density	score 1-9	Morphology	0.72	LU-12/04/2017		380	5.52	0.56	7.12	4.12	14	5.3	0.57	6.2	4.2	0.12	0	0	0.62	0.08	0.36	80	0.06	0.02	0.68	0.69	0.51
GRH_avg	Growth Habit	score 1-9	Morphology	0.65	ME-11/05/2016;LU-21/03/2016;PO-13/05/2016	4.54	385	4.41	0.49	5.49	2.78	29	4.4	0.94	6.97	2.79	0.07	3	0.19	0.64	0.07	0.42	734	0.12	0	0.64	0.72	0.62
HEA_avg	Heading Date	degree days	Phenology	0.99	LU-2016;PO-2016;LU-2017;PO-2017	0.1	385	930.64	112.64	1296.27	580.95	17	952.39	128.32	1238.24	739.78	0.09	65	0.8	0.86	0.04	0.93	10	0.51	0.03	0.57	0.61	0.7
HEA_lu16	Heading Date	degree days	Phenology	0.97	LU-2016		380	1065.51	111.18	1385.44	731.6	17	1042.57	119.78	1292.22	786.26	0.07	59	0.78	0.83	0.04	0.9	25	0.5	0.05	0.62	0.51	0.63
HEA_lu17	Heading Date	degree days	Phenology	0.98	LU-2017		380	1088.43	156.37	1605.27	643.1	17	1040.55	185.43	1472.45	747.95	0.09	49	0.79	0.85	0.03	0.91	10	0.58	0.04	0.56	0.64	0.67
HEA_po16	Heading Date	degree days	Phenology	0.97	PO-2016		385	763	82.64	1086.92	481.41	14	780.2	87.28	947.5	653.74	0.09	51	0.74	0.84	0.05	0.91	9	0.42	0.03	0.58	0.66	0.68
HEA_po17	Heading Date	degree days	Phenology	0.98	PO-2017		385	803.77	108.01	1076.87	460.36	14	812.66	122.55	1060.27	587.66	0.1	69	0.8	0.88	0.03	0.95	19	0.48	0.02	0.64	0.6	0.77
resCH300h_lu16	Canopy Height 300 degree days before heading corrected for earliness	millimetres	Canopy height	NA	LU-2016		380	-1.21	19.88	58	-49.17	14	6.38	20.73	42.45	-28.58	0.04	0	0	0.54	0.1	0.66	91	0.02	0.01	0.58	0.62	0.52
resCH300h_lu17	Canopy Height 300 degree days before heading corrected for earliness	millimetres	Canopy height	NA	LU-2017		353	-0.39	14.14	47.62	-52.15	12	12.03	14.33	41.81	-11.01	0.1	0	0	0.61	0.07	0.47	29	0.35	0.04	0.65	0.74	0.63
resCH300h_po16	Canopy Height 300 degree days before heading corrected for earliness	millimetres	Canopy height	NA	PO-2016		384	-1.78	31.19	74.32	-92.17	14	18	36.62	78.26	-46.15	0.11	0	0	0.73	0.06	0.56	212	0.06	0.02	0.58	0.62	0.7
resCH300h_po17	Canopy Height 300 degree days before heading corrected for earliness	millimetres	Canopy height	NA	PO-2017		385	-0.29	17.92	49.81	-57.89	14	15.01	10.52	28.83	-1.13	0.11	0	0	0.6	0.07	0.13	10	0.06	0.02	0.82	0.8	0.54
resCHs300_me16	Canopy Height 300 degree days after start of growth corrected for earliness	millimetres	Canopy height	NA	ME-2016		350	-1.51	8.34	26.81	-20.2	14	6.22	14.66	34.09	-20.89	0.04	0	0	0.5	0.07	0.51	102	-0.22	0.04	0.58	0.6	0.6
resCHs300_me17	Canopy Height 300 degree days after start of growth corrected for earliness	millimetres	Canopy height	NA	ME-2017		350	0.21	7	22.08	-25.75	14	4.38	8.2	19.98	-8.75	0.04	0	0	0.47	0.1	0.38	788	-0.16	0.02	0.54	0.66	0.63
resCHs300_lu16	Canopy Height 300 degree days after start of growth corrected for earliness	millimetres	Canopy height	NA	LU-2016		380	-0.66	7.13	30.75	-20.73	14	5.7	7.89	18.72	-3.87	0.04	0	0	0.59	0.07	0.64	1582	-0.1	0.02	0.62	0.61	0.68
resCHs300_lu17	Canopy Height 300 degree days after start of growth corrected for earliness	millimetres	Canopy height	NA	LU-2017		380	-0.03	5.94	19.88	-22.18	14	4.53	6.05	16.99	-3.44	0.06	4	0.15	0.52	0.09	0.57	1	0.65	0.05	0.54	0.6	0.66
resCHs300_po16	Canopy Height 300 degree days after start of growth corrected for earliness	millimetres	Canopy height	NA	PO-2016		385	-1.15	32.33	89.56	-120.8	14	16.2	18.45	54.93	-16.16	0.12	0	0	0.81	0.05	0.67	48	0.37	0.01	0.7	0.71	0.77
resCHs300_po17	Canopy Height 300 degree days after start of growth corrected for earliness	millimetres	Canopy height	NA	PO-2017		385	0	11.05	31.93	-35.75	14	11.97	11.14	39.11	-1.7	0.16	2	0.03	0.6	0.06	-0.09	451	-0.15	0.01	0.74	0.82	0.63
resCH400h_lu16	Canopy Height 400 degree days before heading corrected for earliness	millimetres	Canopy height	NA	LU-2016		380	-0.71	14.38	47.5	-34.63	14	5.57	16.25	30.89	-21.94	0.03	0	0	0.55	0.08	0.6	14	0.28	0.11	0.53	0.59	0.55
resCH400h_lu17	Canopy Height 400 degree days before heading corrected for earliness	millimetres	Canopy height	NA	LU-2017		377	-0.35	11.64	38.09	-47.48	12	10.79	12.05	36.85	-6.07	0.08	0	0	0.57	0.06	0.18	511	0.12	0	0.71	0.59	0.5
resCH400h_po16	Canopy Height 400 degree days before heading corrected for earliness	millimetres	Canopy height	NA	PO-2016		385	-1.07	24.8	64.31	-71.52	14	19.99	26.69	66.33	-25.87	0.14	0	0	0.69	0.06	0.54	95	-0.02	0	0.58	0.61	0.74
resCH400h_po17	Canopy Height 400 degree days before heading corrected for earliness	millimetres	Canopy height	NA	PO-2017		385	-0.08	13.42	38.86	-49.45	14	10.7	10.07	25.5	-7.91	0.12	0	0	0.61	0.08	-0.2	1034	0.04	0.02	0.75	0.87	0.61
resCHs500_me16	Canopy Height 500 degree days after start of growth corrected for earliness	millimetres	Canopy height	NA	ME-2016		350	-4.62	22.45	84.91	-61.07	14	10.92	27.01	54.04	-57.73	0.04	0	0	0.56	0.12	0.57	577	-0.18	0.05	0.5	0.61	0.56
resCHs500_me17	Canopy Height 500 degree days after start of growth corrected for earliness	millimetres	Canopy height	NA	ME-2017		350	-1.72	11.88	42.78	-30.25	14	13.93	10.47	28.67	-4.85	0.04	0	0	0.45	0.1	0.28	22	0.3	0.14	0.66	0.63	0.48
resCHs500_lu16	Canopy Height 500 degree days after start of growth corrected for earliness	millimetres	Canopy height	NA	LU-2016		380	-1.19	15.68	73.34	-39.06	14	10.55	9.97	28.36	-4.48	0.05	0	0	0.45	0.09	0.07	1477	-0.27	0.01	0.66	0.62	0.58
resCHs500_lu17	Canopy Height 500 degree days after start of growth corrected for earliness	millimetres	Canopy height	NA	LU-2017		380	0.27	10.8	46.75	-33.61	14	9.41	8.15	28.18	0.87	0.06	0	0	0.52	0.09	0.55	119	0.17	0.1	0.55	0.65	0.69
resCHs500_po17	Canopy Height 500 degree days after start of growth corrected for earliness	millimetres	Canopy height	NA	PO-2017		384	-0.01	21.46	152.03	-82.76	14	15.56	13.77	37.11	-4.44	0.09	0	0	0.46	0.1	-0.13	517	-0.1	0.01	0.81	0.82	0.68
HFY_avg	Heading First Year	score 1-9	Phenology	0.9	LU-25/06/2015;LU-28/07/2015;PO-23/07/2015;PO-28/07/2015	0.63	385	1.23	0.55	5.04	0.71	14	1.13	0.23	1.71	0.93	0.07	20	0.58	0.61	0.12	0.84	101	0.33	0.02	0.87	0.89	0.68
HFY_lu15	Heading First Year	score 1-9	Phenology	0.63	LU-25/06/2015;LU-28/07/2015		380	1.08	0.24	3.33	0.96	14	1.06	0.12	1.36	0.96	0.04	30	0.65	0.48	0.06	0.53	10	0.13	0.26	0.71	0.67	0.62
HFY_po15	Heading First Year	score 1-9	Phenology	0.93	PO-23/07/2015;PO-28/07/2015		385	1.39	0.92	7.06	0.86	14	1.21	0.42	2.13	0.89	0.07	16	0.52	0.61	0.09	0.71	7	0.72	0.04	0.79	0.8	0.66
HST_lu17	Straw Height	centimetres	Sexual reproduction	0.84	LU-07/06/2017		378	41.66	5.47	54.53	27.35	13	47	4.9	54.68	35.38	0.08	35	0.63	0.79	0.05	0.87	13	0.33	0.06	0.58	0.69	0.76
LMW_avg	Lamina Width	score 1-9	Morphology	0.89	ME-13/05/2016;LU-12/04/2017;PO-18/04/2016	0.71	385	3.83	0.89	6.19	1.76	29	4.23	1.04	7.23	2.54	0.04	51	0.62	0.8	0.05	0.74	22	0.54	0.01	0.64	0.58	0.69
LMW_me16	Lamina Width	score 1-9	Morphology	0.91	ME-13/05/2016		350	3.81	1.57	7.2	1	26	4.49	1.27	7.34	2.2	0.02	55	0.71	0.81	0.03	0.78	8	0.66	0.03	0.68	0.64	0.76
LMW_lu17	Lamina Width	score 1-9	Morphology	0.88	LU-12/04/2017		380	2.7	0.83	5.07	1.03	17	3.34	0.67	4.79	2.26	0.11	12	0.3	0.74	0.05	0.72	112	0.11	0.01	0.57	0.59	0.78
LMW_po16	Lamina Width	score 1-9	Morphology	0.71	PO-18/04/2016		385	4.98	0.73	7.13	3	14	5.14	0.52	6.29	4.27	0.04	0	0	0.64	0.08	0.85	1076	-0.07	0.01	0.59	0.62	0.63
LSL_lu17	Spikelet Length	millimetres	Sexual reproduction	0.5	LU-13/06/2017		375	9.51	1.08	12.76	7	9	9.66	1.14	10.98	7.95	0.02	0	0	0.39	0.09	0.68	524	0.08	0.01	0.66	0.66	0.73
LSP_lu17	Spike Length	millimetres	Sexual reproduction	0.53	LU-13/06/2018		375	178.54	20.52	238.04	126.54	9	179.75	31.46	212.37	106.04	0.09	0	0	0.52	0.08	0.77	173	-0.11	0.01	0.73	0.74	0.78
NDF_04_me17	NIRS NDF	% DM	Biochemistry	0.7	ME-19/04/2017		350	36.98	1.43	42.56	32.71	26	37.24	1.15	39.17	34.72	0.05	0	0	0.5	0.08	0.31	4	0.26	0.09	0.44	0.61	0.43
NDF_10_lu17	NIRS NDF	% DM	Biochemistry	0.79	ME-04/10/2017		350	47.38	1.87	53.13	42.79	26	46.65	1.75	49.24	42.04	0.13	0	0	0.7	0.06	0.32	26	0.37	0.02	0.67	0.64	0.69
NDF_avg	NIRS NDF	% DM	Biochemistry	0.78	ME-19/04/2017;ME-04/10/2017	0.85	350	42.18	1.4	46.6	38.2	26	41.95	1.12	43.63	38.59	0.1	0	0	0.66	0.07	0.2	111	0.31	0.01	0.69	0.66	0.69
NLI_lu16	Lamina %N	% DM	Lamina chemistry	0.41	LU-19/04/2016		380	2.71	0.16	3.18	2.19	6	2.89	0.16	3.08	2.69	0.05	0	0	0.4	0.1	0.37	663	0.2	0.03	0.55	0.59	0.66
NSL_lu17	Spikelet Count	Count	Sexual reproduction	0.48	LU-13/06/2017		375	23.84	2.49	32.09	16.52	9	23.92	2.9	27.52	18.14	0.08	0	0	0.52	0.09	0.54	56	0.04	0.04	0.62	0.64	0.65
OMD_04_me17	NIRS Organic Matter Digestibility	% DM	Biochemistry	0.67	ME-19/04/2017		350	91.53	1.4	94.82	82.72	26	91.25	1.22	93.59	88.34	0.05	0	0	0.51	0.1	0.2	61	0.25	0.07	0.55	0.57	0.63
OMD_10_me17	NIRS Organic Matter Digestibility	% DM	Biochemistry	0.65	ME-04/10/2017		350	83.13	1.9	88.64	76.62	26	83.53	1.6	88.2	81.37	0.09	0	0	0.49	0.08	0.17	4	-0.28	0.05	0.6	0.6	0.75
OMD_avg	NIRS Organic Matter Digestibility	% DM	Biochemistry	0.61	ME-19/04/2017;ME-04/10/2017	4.22	350	87.33	1.25	90.64	81.7	26	87.39	1.05	89.86	85.64	0.05	0	0	0.54	0.09	0.06	364	-0.18	0.09	0.58	0.57	0.64
PRT_04_me17	NIRS Raw Protein	% DM	Biochemistry	0.78	ME-19/04/2017		350	14.2	1.03	16.64	10.72	26	13.47	0.8	14.77	11.53	0.05	18	0.43	0.64	0.08	0.49	32	0.21	0	0.61	0.69	0.74
PRT_10_me17	NIRS Raw Protein	% DM	Biochemistry	0.73	ME-04/10/2017		350	16.36	1.65	20.72	11.31	26	14.93	1.36	17.87	12.53	0.18	0	0	0.66	0.05	0.37	37	0.17	0.01	0.6	0.58	0.84
PRT_avg	NIRS Raw Protein	% DM	Biochemistry	0.72	ME-19/04/2017;ME-04/10/2017	1.82	350	15.28	1.09	18.57	12.41	26	14.2	0.72	15.75	13.08	0.16	0	0	0.68	0.06	0.08	144	-0.06	0.04	0.68	0.75	0.85
RAS_avg	Regularity After Sowing	score 1-9	Emergence	0.63	ME-24/12/2015;LU-02/06/2015;PO-09/06/2015	0.74	385	7.2	0.66	8.78	4.11	26	7.24	1.03	8.79	4.13	0.06	0	0	0.35	0.11	0.15	19	0.55	0.12	0.59	0.68	0.81
RAS_me15	Regularity After Sowing	score 1-9	Emergence	0.87	ME-24/12/2015		350	6.63	1.23	9.25	1.96	26	6.88	1.33	9.25	3.58	0.1	0	0	0.43	0.09	0.47	277	0.14	0.1	0.59	0.58	0.62
RAS_lu15	Regularity After Sowing	score 1-9	Emergence	0.48	LU-02/06/201		380	6.67	0.71	8.26	3.01	14	6.75	0.96	7.76	4.4	0.03	0	0	0.23	0.07	0.19	48	-0.2	0.12	0.65	0.69	0.79
RAS_po15	Regularity After Sowing	score 1-9	Emergence	0.42	PO-09/06/2015		385	8.31	0.64	9.61	6.01	14	8.21	0.95	9.61	6.35	0.03	0	0	0.23	0.13	0.09	13	0.24	0.14	0.7	0.67	0.72
SCD_su15_lu	Soil Coverage	difference (soil coverage at late minus at early)	Persistency dynamics	0.45	LU-28/07/2015>16/11/2015		380	-0.79	0.47	1	-2	16	-0.75	0.39	0	-1.33	0.09	0	0	0.4	0.09	-0.11	50	0.17	0.04	0.63	0.69	0.71
SCD_wi1516_lu	Soil Coverage	difference (soil coverage at late minus at early)	Persistency dynamics	0.79	LU-16/11/2015>22/06/2016		380	0.56	0.38	1.67	-1.33	16	0.67	0.29	1	0	0.02	0	0	0.37	0.07	0.7	9	-0.21	0.1	0.65	0.68	0.74
SCD_15to18_lu	Soil Coverage	difference (soil coverage at late minus at early)	Persistency dynamics	0.77	LU-28/07/2015>21/06/2018		380	-0.92	0.58	0.67	-3.33	16	-0.45	0.56	0.67	-1	0.07	0	0	0.62	0.06	0.75	168	0.07	0.04	0.72	0.71	0.58
SCD_su16_lu	Soil Coverage	difference (soil coverage at late minus at early)	Persistency dynamics	0.84	LU-22/06/2016>03/11/2016		380	-0.95	0.46	0.33	-3.67	16	-0.83	0.33	-0.33	-1.33	0.05	0	0	0.54	0.07	-0.09	8	0.31	0.12	0.54	0.6	0.54
SCD_wi1617_lu	Soil Coverage	difference (soil coverage at late minus at early)	Persistency dynamics	0.65	LU-03/11/2016>30/03/2017		380	0.98	0.4	2.33	0	16	0.9	0.33	1.33	0.33	0.05	0	0	0.3	0.13	0.05	80	0.12	0.05	0.49	0.66	0.62
SCD_su17_lu	Soil Coverage	difference (soil coverage at late minus at early)	Persistency dynamics	0.54	LU-03/07/2017>15/11/2017		380	-0.31	0.52	1	-3.33	16	-0.16	0.36	0.33	-1	0.06	0	0	0.12	0.12	0.01	236	0.09	0.1	1.29	1.27	1.4
SCD_wi1718_lu	Soil Coverage	difference (soil coverage at late minus at early)	Persistency dynamics	0.64	LU-15/11/2017>21/06/2018		380	-0.04	0.56	1.67	-1.67	16	0.27	0.71	2	-0.67	0.04	5	0.19	0.59	0.09	0.68	274	0.06	0.08	0.68	0.71	0.77
SCD_wi1516_po	Soil Coverage	difference (soil coverage at late minus at early)	Persistency dynamics	0.81	PO-16/10/2015>03/06/2016		385	-1.3	0.61	0.35	-4.28	14	-1.35	0.53	-0.05	-2.03	0.02	2	0.1	0.46	0.09	0.59	13	0.29	0.09	0.79	0.72	0.57
SCD_15to17_po	Soil Coverage	difference (soil coverage at late minus at early)	Persistency dynamics	0.32	PO-16/10/2015>04/09/2017		385	-1.71	0.57	0.33	-4.03	14	-1.99	0.45	-1.05	-2.69	0.03	0	0	0.26	0.12	0.2	30	0.21	0.31	0.5	0.46	0.42
SCD_wi1617_po	Soil Coverage	difference (soil coverage at late minus at early)	Persistency dynamics	0.8	PO-02/11/2016>12/06/2017		385	-2.06	1.62	1.42	-6.58	14	-1.44	1.11	0.39	-3.26	0.18	0	0	0.74	0.06	0.36	18	0.22	0	0.91	0.89	0.62
SCD_16to17_me	Soil Coverage	difference (soil coverage at late minus at early)	Persistency dynamics	0.62	ME-07/09/2016>19/10/2017		350	-0.64	0.55	0.75	-2.92	26	-0.08	0.44	1.28	-1.18	0.05	0	0	0.5	0.09	0.23	88	-0.13	0.02	0.66	0.68	0.68
SCD_su17_me	Soil Coverage	difference (soil coverage at late minus at early)	Persistency dynamics	0.55	ME-01/04/2017>19/10/2017		350	-0.81	0.58	1.93	-3.2	26	-0.38	0.52	0.41	-1.8	0.03	0	0	0.42	0.1	0.36	192	0.19	0.03	0.74	0.8	0.7
SCD_wi1617_me	Soil Coverage	difference (soil coverage at late minus at early)	Persistency dynamics	0.45	ME-07/09/2016>01/04/2017		350	0.17	0.34	2.28	-2.31	26	0.3	0.39	1.29	-0.05	0.02	0	0	0.21	0.13	0.2	9	0.23	0.14	0.69	0.63	0.63
SGR_me16	Summer Growth Rate	millimetres by degree day	Canopy height	0.48	ME-04/08/2016>24/08/2016		350	0.32	0.07	0.47	-0.03	26	0.36	0.06	0.48	0.2	0.1	0	0.09	0.67	0.05	0.01	14	-0.19	0.01	0.54	0.58	0.58
SGR_me17	Summer Growth Rate	millimetres by degree day	Canopy height	0.37	ME-14/06/2017>21/08/2017		350	0.09	0.02	0.15	0.04	26	0.11	0.02	0.15	0.08	0	0	0	0.29	0.1	0.31	44	0.64	0.1	0.58	0.62	0.55
SGR_lu16	Summer Growth Rate	millimetres by degree day	Canopy height	0.83	LU-29/06/2016>25/07/2016		380	-0.01	0.02	0.07	-0.06	14	-0.02	0.01	0	-0.04	0.08	7	0.13	0.81	0.04	0.71	38	0.24	0.02	0.82	0.79	0.5
SGR_po17	Summer Growth Rate	millimetres by degree day	Canopy height	0.8	PO-27/07/2017>29/08/2017		385	0.1	0.03	0.17	0.01	14	0.1	0.05	0.17	0.01	0.26	0	0	0.76	0.04	0.51	51	-0.09	0.05	0.74	0.71	0.7
SMH_me16	Summer Maximum Height	millimetres	Canopy height	0.54	ME-04/08/2016>24/08/2016		350	248.9	25.93	302.82	86.61	26	258.56	21.71	298.48	211.26	0.1	0	0.05	0.71	0.05	0.21	621	-0.09	0.06	0.78	0.8	0.55
SMH_me17	Summer Maximum Height	millimetres	Canopy height	0.51	ME-14/06/2017>21/08/2017		350	123.76	11.1	159.78	91.18	26	137.15	7.79	161.27	124.68	0.01	0	0	0.37	0.1	0.37	118	0.02	0.01	0.67	0.72	0.69
SMH_lu16	Summer Maximum Height	millimetres	Canopy height	0.72	LU-29/06/2016>25/07/2016		380	86.94	9.27	146	55.25	14	88.32	8.59	106.25	77.11	0.01	1	0.11	0.63	0.09	0.21	5	0.44	0.02	0.43	0.33	0.56
SMH_po17	Summer Maximum Height	millimetres	Canopy height	0.79	PO-27/07/2017>29/08/2017		385	135.49	19.5	177.48	78.18	14	137.26	24.7	170.29	90.91	0.22	0	0	0.76	0.06	0.6	22	0.51	0.03	0.81	0.74	0.63
VAC_avg	Vigour After Cutting	score 1-9	Regrowth dynamics	0.91	LU-21/06/2016;LU-21/09/2016;LU-05/07/2017;LU-26/07/2017;PO-27/06/2017	0.59	380	4.88	0.59	6.89	2.68	17	5.69	0.69	6.77	3.62	0.1	1	0.36	0.83	0.04	0.74	90	0.35	0.08	0.77	0.77	0.73
VAC_lu16	Vigour After Cutting	score 1-9	Regrowth dynamics	0.83	LU-21/06/2016;LU-21/09/2016		380	3.84	0.48	5.73	2.05	17	4.52	0.62	5.72	2.72	0.08	1	0.03	0.74	0.08	0.49	1	0.37	0.1	0.55	0.57	0.78
VAC_lu17	Vigour After Cutting	score 1-9	Regrowth dynamics	0.87	LU-05/07/2017;LU-26/07/2017		380	5.81	0.67	8.35	3.12	17	6.3	0.7	7.28	4.34	0.09	2	0.28	0.76	0.06	0.54	140	0.32	0.02	0.67	0.69	0.75
VAC_po17	Vigour After Cutting	score 1-9	Regrowth dynamics	0.89	PO-27/06/2017		385	4.87	0.6	6.84	2.64	14	6.7	1.19	8.99	4.91	0.1	2	0.45	0.81	0.05	0.65	8	0.61	0.01	0.69	0.69	0.67
VAS_avg	Vigour After Sowing	score 1-9	Emergence	0.46	ME-24/12/2015;PO-09/06/2015	2.2	385	4.79	0.95	6.96	1.53	14	5.36	1.23	7.07	3.64	0.09	1	0.12	0.45	0.07	0.76	122	0.12	0.01	0.65	0.6	0.63
VAS_me15	Vigour After Sowing	score 1-9	Emergence	0.83	ME-24/12/2015		350	6.04	1.43	8.97	1.05	26	6.34	1.54	8.97	2.97	0.06	0	0	0.4	0.09	0.4	6	0.44	0.2	0.6	0.66	0.63
VAS_lu15	Vigour After Sowing	score 1-9	Emergence	0.41	LU-05/06/2015		380	7.93	0.35	8.93	6.95	14	7.97	0.35	8.61	7.11	0.02	0	0	0.33	0.12	0.34	152	-0.24	0.03	0.6	0.66	0.72
VAS_po15	Vigour After Sowing	score 1-9	Emergence	0.45	PO-09/06/2015		385	3.54	0.81	5.81	1.33	14	3.92	1.09	5.16	2.22	0.11	0	0	0.45	0.09	0.25	64	-0.18	0.16	0.51	0.49	0.62
WID_po16	Winter Damage	score 1-9	Abiotic stresses	0.89	PO-02/03/2016		385	6.38	0.8	9.3	4.65	14	6.47	0.67	7.7	5.31	0.22	0	0	0.83	0.03	0.74	28	0.11	0.01	0.86	0.82	0.72
WID_po17	Winter Damage	score 1-9	Abiotic stresses	0.64	PO-03/03/2017		385	3.98	0.88	7.22	1.54	14	3.05	0.81	4.58	2.01	0.04	0	0	0.42	0.11	0.17	65	0.17	0.07	0.72	0.72	0.66
WSC_04_me17	NIRS Water Soluble Carbohydrates	% DM	Biochemistry	0.7	ME-19/04/2017		350	32.23	2.02	37.61	26.29	26	32.59	2.47	38.57	28.29	0.05	0	0	0.57	0.1	0.65	1663	0.19	0.01	0.56	0.57	0.59
WSC_10_me17	NIRS Water Soluble Carbohydrates	% DM	Biochemistry	0.8	ME-04/10/2017		350	18.78	2.83	28.29	10.87	26	20.71	2.79	27.29	16.27	0.17	0	0	0.71	0.07	0.28	518	0.01	0.01	0.66	0.66	0.77
WSC_avg	NIRS Water Soluble Carbohydrates	% DM	Biochemistry	0.74	ME-19/04/2017;ME-04/10/2017	1.86	350	25.51	1.96	31.34	19.83	26	26.65	1.7	31.23	23.11	0.12	0	0	0.67	0.08	0.11	200	-0.09	0.03	0.65	0.62	0.76
In order of columns: Variable name, variable description, unit of measure, type of variable, H² (analogous to broad sense heritability), measure locations and dates, variance due to population x environment interaction divided by the variance due to inter-population variance, number of natural and cultivar populations characterised, mean value, standard deviation, maximum value, minimum value for…
